# Supplementary material for: Ground and excited state properties of photoactive platinum(iv) diazido complexes: Theoretical considerations
Source: Royal Society of Chemistry journal article supplement (doi:10.1039/c1dt10493d), 2011-01-01

# **Ground and Excited State Properties of Photoactive Platinum(IV) Diazido Complexes: Theoretical Considerations**

**Alexander Yu. Sokolov\* and Henry F. Schaefer III**

Center for Computational Quantum Chemistry

University of Georgia

Athens, Georgia 30602

\* E-mail for correspondence: alex@ccqc.uga.edu

## **Supporting Information**

**Tables S1-S13.** Energies and theoretical Cartesian coordinates of the complexes **1t** and **1c-12c** optimized using the  $\omega$ B97X density functional with CRENBL(Pt)/6-311+G\* basis set.

**Figures S1-S11.** Optimized structures of complexes **2c-12c**.

**Figures S12-S22.** Computed electronic spectra of complexes **2c-12c**.

**Table S1.** The energy  $E$  (in a.u.) and theoretical Cartesian coordinates (in Å) for the optimized structure of the complex **1t** computed using the  $\omega$ B97X density functional with CRENBL(Pt)/6-311+G\* basis set.

$E_{GS} = -712.8291558461$

|    |           |           |           |
|----|-----------|-----------|-----------|
| Pt | 0.000000  | 0.000000  | 0.000000  |
| O  | -0.931001 | -0.354022 | 1.750629  |
| H  | -0.260705 | -0.434166 | 2.436601  |
| N  | 0.128725  | -1.991270 | -0.435220 |
| H  | 0.872857  | -2.125627 | -1.116432 |
| H  | -0.754946 | -2.274498 | -0.851884 |
| H  | 0.300647  | -2.551812 | 0.393219  |
| N  | -1.803361 | -0.008832 | -0.995214 |
| N  | -2.784727 | 0.255621  | -0.321145 |
| N  | -3.738664 | 0.502159  | 0.235484  |
| O  | 0.931001  | 0.354022  | -1.750629 |
| H  | 0.260705  | 0.434166  | -2.436601 |
| N  | -0.128725 | 1.991270  | 0.435220  |
| H  | -0.872857 | 2.125627  | 1.116432  |
| H  | 0.754946  | 2.274498  | 0.851884  |
| H  | -0.300647 | 2.551812  | -0.393219 |
| N  | 1.803361  | 0.008832  | 0.995214  |
| N  | 2.784727  | -0.255621 | 0.321145  |
| N  | 3.738664  | -0.502159 | -0.235484 |

**Table S2.** The energy  $E$  (in a.u.) and theoretical Cartesian coordinates (in Å) for the optimized structure of the complex **1c** computed using the  $\omega$ B97X density functional with CRENL(Pt)/6-311+G\* basis set.

$$E_{GS} = -712.8279662756$$

|    |           |           |           |
|----|-----------|-----------|-----------|
| Pt | -0.569966 | 0.053112  | -0.040492 |
| N  | 0.758924  | 1.036103  | -1.205246 |
| N  | 1.556446  | 1.740435  | -0.603391 |
| N  | 2.331327  | 2.412201  | -0.129257 |
| N  | 0.837476  | -0.817001 | 1.121947  |
| N  | 1.683968  | -1.460518 | 0.518595  |
| N  | 2.506178  | -2.072483 | 0.043327  |
| N  | -1.999055 | 1.087418  | -1.175015 |
| H  | -2.684401 | 0.492855  | -1.627708 |
| H  | -1.457690 | 1.561782  | -1.894343 |
| H  | -2.445877 | 1.792170  | -0.594936 |
| N  | -1.907486 | -1.091235 | 1.099185  |
| H  | -2.626217 | -0.547899 | 1.564494  |
| H  | -1.323830 | -1.528633 | 1.808920  |
| H  | -2.311858 | -1.823802 | 0.522754  |
| O  | -0.670620 | -1.475130 | -1.349708 |
| H  | 0.069568  | -1.439963 | -1.961935 |
| O  | -0.800260 | 1.568085  | 1.268699  |
| H  | -0.056560 | 1.603039  | 1.876626  |

**Table S3.** The energy  $E$  (in a.u.) and theoretical Cartesian coordinates (in Å) for the optimized structure of the complex **2c** computed using the  $\omega$ B97X density functional with CRENBL(Pt)/6-311+G\* basis set.

$E_{GS} = -791.4333593550$

|    |           |           |           |
|----|-----------|-----------|-----------|
| Pt | 0.357584  | 0.090915  | -0.057723 |
| N  | -1.043513 | 1.554000  | 0.000854  |
| N  | -1.827308 | 1.564524  | -0.934895 |
| N  | -2.592834 | 1.645693  | -1.763525 |
| N  | -1.004913 | -1.388607 | -0.305045 |
| N  | -1.909541 | -1.407364 | 0.514230  |
| N  | -2.780789 | -1.496602 | 1.229944  |
| N  | 1.749940  | 1.676101  | -0.010177 |
| H  | 1.510189  | 2.160852  | -0.873352 |
| H  | 2.701140  | 1.345311  | -0.134068 |
| C  | 1.666611  | 2.573950  | 1.158885  |
| H  | 0.652408  | 2.966768  | 1.209540  |
| H  | 1.856834  | 1.992460  | 2.059307  |
| H  | 2.382893  | 3.394192  | 1.068261  |
| N  | 1.764802  | -1.475246 | 0.086823  |
| H  | 2.688222  | -1.130290 | 0.327170  |
| C  | 1.842886  | -2.381480 | -1.076330 |
| H  | 1.423916  | -1.957912 | 0.916586  |
| H  | 2.133455  | -1.801325 | -1.950585 |
| H  | 0.849819  | -2.793030 | -1.249194 |
| H  | 2.556570  | -3.188037 | -0.891367 |
| O  | 0.630729  | 0.294586  | -2.045382 |
| H  | -0.108786 | -0.090675 | -2.523684 |
| O  | 0.358420  | -0.111236 | 1.948827  |
| H  | -0.445748 | 0.261792  | 2.320543  |

**Table S4.** The energy  $E$  (in a.u.) and theoretical Cartesian coordinates (in Å) for the optimized structure of the complex **3c** computed using the  $\omega$ B97X density functional with CRENBL(Pt)/6-311+G\* basis set.

$E_{GS} = -1307.8545430835$

|    |           |           |           |
|----|-----------|-----------|-----------|
| Pt | 0.219021  | 0.001083  | 0.000330  |
| N  | 1.571341  | 1.386728  | -0.413628 |
| N  | 2.327788  | 1.642999  | 0.526764  |
| N  | 3.078863  | 1.960860  | 1.301853  |
| N  | 1.582590  | -1.371611 | 0.417811  |
| N  | 2.341660  | -1.623789 | -0.521586 |
| N  | 3.095804  | -1.937253 | -1.295489 |
| N  | -1.332858 | 1.592023  | -0.420318 |
| F  | -2.529451 | 1.109666  | -0.825178 |
| F  | -0.984314 | 2.433983  | -1.402097 |
| F  | -1.640545 | 2.394910  | 0.606239  |
| N  | -1.322093 | -1.601791 | 0.418263  |
| F  | -2.515256 | -1.128334 | 0.842502  |
| F  | -0.959763 | -2.454727 | 1.385567  |
| F  | -1.639084 | -2.393106 | -0.614615 |
| O  | 0.101499  | -0.476330 | -1.938017 |
| H  | 0.768498  | -0.001088 | -2.442759 |
| O  | 0.093009  | 0.476780  | 1.938651  |
| H  | 0.763426  | 0.007545  | 2.444501  |

**Table S5.** The energy  $E$  (in a.u.) and theoretical Cartesian coordinates (in Å) for the optimized structure of the complex **4c** computed using the  $\omega$ B97X density functional with CRENBL(Pt)/6-311+G\* basis set.

$E_{GS} = -1285.9748070420$

|    |           |           |           |
|----|-----------|-----------|-----------|
| Pt | 0.344032  | 0.069547  | 0.022840  |
| N  | -1.038988 | 1.354843  | 0.875423  |
| N  | -1.758948 | 1.921565  | 0.069315  |
| N  | -2.460548 | 2.480988  | -0.618340 |
| N  | -1.120112 | -1.089227 | -0.872988 |
| N  | -1.909963 | -1.589557 | -0.088672 |
| N  | -2.676974 | -2.084562 | 0.578276  |
| P  | 1.823284  | 1.547446  | 0.989223  |
| H  | 1.520912  | 1.818468  | 2.327185  |
| H  | 1.832671  | 2.807790  | 0.379327  |
| H  | 3.193627  | 1.241591  | 1.052465  |
| P  | 1.719486  | -1.537804 | -0.885995 |
| H  | 1.606804  | -2.785327 | -0.260585 |
| H  | 1.431852  | -1.802478 | -2.228690 |
| H  | 3.111851  | -1.348066 | -0.915116 |
| O  | 0.472922  | 1.144715  | -1.694125 |
| H  | -0.301759 | 0.930696  | -2.224332 |
| O  | 0.325830  | -1.011611 | 1.741956  |
| H  | -0.443510 | -0.731709 | 2.248673  |

**Table S6.** The energy  $E$  (in a.u.) and theoretical Cartesian coordinates (in Å) for the optimized structure of the complex **5c** computed using the  $\omega$ B97X density functional with CRENBL(Pt)/6-311+G\* basis set.

$E_{GS} = -1881.6606779840$

|    |           |           |           |
|----|-----------|-----------|-----------|
| Pt | -0.001507 | -0.223882 | -0.000292 |
| N  | -1.459651 | -1.625859 | 0.339919  |
| N  | -1.683201 | -2.347056 | -0.628811 |
| N  | -1.945363 | -3.055732 | -1.463613 |
| N  | 1.427802  | -1.656523 | -0.336367 |
| N  | 1.629300  | -2.384191 | 0.632267  |
| N  | 1.870117  | -3.099814 | 1.467648  |
| P  | -1.769327 | 1.193873  | 0.287349  |
| F  | -2.550009 | 1.028059  | 1.616963  |
| F  | -2.912722 | 1.095123  | -0.755542 |
| F  | -1.505315 | 2.735003  | 0.292249  |
| P  | 1.795547  | 1.159697  | -0.287224 |
| F  | 2.933676  | 1.042022  | 0.759348  |
| F  | 2.576769  | 0.974228  | -1.614016 |
| F  | 1.561362  | 2.705529  | -0.297822 |
| O  | -0.342273 | -0.198422 | -1.997560 |
| H  | 0.178103  | -0.909164 | -2.388087 |
| O  | 0.339927  | -0.199868 | 1.997207  |
| H  | -0.193825 | -0.899419 | 2.389877  |

**Table S7.** The energy  $E$  (in a.u.) and theoretical Cartesian coordinates (in Å) for the optimized structure of the complex **6c** computed using the  $\omega$ B97X density functional with CRENBL(Pt)/6-311+G\* basis set.

$$E_{GS} = -752.5153659447$$

|    |           |           |           |
|----|-----------|-----------|-----------|
| Pt | 0.308172  | 0.059342  | 0.072749  |
| N  | -0.533077 | 1.688449  | 0.840292  |
| N  | -1.420926 | 2.198416  | 0.164511  |
| N  | -2.243482 | 2.739578  | -0.384988 |
| N  | -1.350246 | -0.466651 | -0.884670 |
| N  | -1.859193 | -1.513526 | -0.488822 |
| N  | -2.410411 | -2.460136 | -0.223873 |
| O  | -0.210951 | -0.961373 | 1.695622  |
| H  | -0.789306 | -0.423862 | 2.245101  |
| O  | 1.209598  | 0.907028  | -1.534621 |
| H  | 0.609376  | 1.263466  | -2.192523 |
| O  | 1.335628  | -1.648600 | -0.717866 |
| H  | 1.923199  | -2.097793 | -0.102940 |
| H  | 1.835179  | -1.268922 | -1.456082 |
| O  | 2.175015  | 0.838264  | 0.867468  |
| H  | 1.999545  | 1.389627  | 1.637878  |
| H  | 2.388719  | 1.414941  | 0.113293  |



**Table S8.** The energy  $E$  (in a.u.) and theoretical Cartesian coordinates (in Å) for the optimized structure of the complex **7c** computed using the  $\omega$ B97X density functional with CRENBL(Pt)/6-311+G\* basis set.

$$E_{\text{GS}} = -826.2974915561$$

|    |           |           |           |
|----|-----------|-----------|-----------|
| Pt | 0.265286  | 0.003714  | -0.008307 |
| N  | -1.181194 | 1.226438  | 0.719095  |
| N  | -1.894366 | 1.733389  | -0.142211 |
| N  | -2.599721 | 2.241994  | -0.857787 |
| N  | -1.168964 | -1.238907 | -0.726597 |
| N  | -1.867386 | -1.752666 | 0.142856  |
| N  | -2.557941 | -2.267883 | 0.868163  |
| O  | 0.249958  | 0.901534  | -1.824342 |
| H  | -0.455664 | 0.488211  | -2.334405 |
| O  | 0.276269  | -0.894667 | 1.809331  |
| H  | -0.431712 | -0.492739 | 2.325076  |
| C  | 1.566085  | 1.381144  | 0.650605  |
| O  | 2.240728  | 2.173909  | 1.061095  |
| C  | 1.585921  | -1.367146 | -0.648174 |
| O  | 2.270822  | -2.161447 | -1.038073 |

**Table S9.** The energy  $E$  (in a.u.) and theoretical Cartesian coordinates (in Å) for the optimized structure of the complex **8c** computed using the  $\omega$ B97X density functional with CRENBL(Pt)/6-311+G\* basis set.

$$E_{\text{GS}} = -751.3582875787$$

|    |           |           |           |
|----|-----------|-----------|-----------|
| Pt | -0.124399 | -0.141026 | 0.111938  |
| N  | -1.753551 | 1.126345  | -0.231599 |
| N  | -2.252585 | 1.196407  | -1.309574 |
| N  | -2.800809 | 1.333802  | -2.314636 |
| N  | 0.820183  | 1.377687  | 1.202743  |
| N  | 2.004813  | 1.418626  | 1.311005  |
| N  | 3.138527  | 1.546066  | 1.476036  |
| O  | -1.030480 | -0.919405 | 1.763473  |
| H  | -0.298227 | -1.381473 | 2.183502  |
| O  | 0.819133  | 0.426788  | -1.595217 |
| H  | 0.353397  | -0.081992 | -2.266772 |
| O  | 1.420378  | -1.355717 | 0.514596  |
| H  | 1.967425  | -1.248434 | -0.270425 |
| O  | -1.036288 | -1.569844 | -0.959411 |
| H  | -1.486456 | -2.058078 | -0.261745 |

**Table S10.** The energy E (in a.u.) and theoretical Cartesian coordinates (in Å) for the optimized structure of the complex **9c** computed using the  $\omega$ B97X density functional with CRENBL(Pt)/6-311+G\* basis set.

$$E_{\text{GS}} = -785.4604140882$$

|    |           |           |           |
|----|-----------|-----------|-----------|
| Pt | 0.295728  | -0.057045 | -0.045567 |
| N  | -1.292057 | 1.148629  | 0.648425  |
| N  | -1.683176 | 2.089096  | 0.021660  |
| N  | -2.120209 | 3.002990  | -0.513038 |
| N  | -1.115598 | -1.533340 | -0.577020 |
| N  | -1.749778 | -2.074194 | 0.278624  |
| N  | -2.410565 | -2.639328 | 1.028658  |
| O  | 0.351495  | -0.814094 | 1.842056  |
| H  | -0.296672 | -0.281126 | 2.313348  |
| O  | 0.090381  | 0.689947  | -1.931591 |
| H  | 0.902583  | 1.153947  | -2.149299 |
| C  | 1.770904  | -1.253260 | -0.599060 |
| N  | 2.641982  | -1.931665 | -0.947234 |
| C  | 1.604255  | 1.358181  | 0.405921  |
| N  | 2.362403  | 2.201959  | 0.639564  |

**Table S11.** The energy E (in a.u.) and theoretical Cartesian coordinates (in Å) for the optimized structure of the complex **10c** computed using the  $\omega$ B97X density functional with CRENL(Pt)/6-311+G\* basis set.

$E_{GS} = -1096.2634778196$

|    |           |           |           |
|----|-----------|-----------|-----------|
| Pt | 0.325430  | 0.029323  | -0.059127 |
| N  | 1.763284  | 1.365892  | -0.539430 |
| N  | 2.597632  | 1.575339  | 0.324527  |
| N  | 3.411993  | 1.836310  | 1.065931  |
| N  | 1.693242  | -1.423140 | 0.259254  |
| N  | 2.385097  | -1.715531 | -0.701157 |
| N  | 3.068889  | -2.056262 | -1.536188 |
| O  | 0.143878  | -0.390381 | -2.026615 |
| H  | 0.906417  | -0.019671 | -2.481132 |
| O  | 0.404780  | 0.454048  | 1.913956  |
| H  | 1.185744  | 0.027340  | 2.279339  |
| C  | -1.793201 | 1.704021  | -1.392771 |
| C  | -1.262716 | 2.449360  | 0.742649  |
| C  | -2.706208 | 2.730242  | -1.563925 |
| H  | -1.565285 | 0.965554  | -2.155905 |
| C  | -2.158004 | 3.500577  | 0.634998  |
| H  | -0.653383 | 2.265058  | 1.623000  |
| C  | -2.892231 | 3.643706  | -0.534592 |
| H  | -3.252952 | 2.809260  | -2.496736 |
| H  | -2.266329 | 4.195227  | 1.460198  |
| H  | -3.598299 | 4.461195  | -0.644877 |
| C  | -1.551952 | -2.230896 | -0.672243 |
| C  | -1.744693 | -1.488488 | 1.520661  |
| C  | -2.511526 | -3.207102 | -0.462539 |
| H  | -1.043445 | -2.080871 | -1.620549 |
| C  | -2.710700 | -2.441182 | 1.796214  |
| H  | -1.362332 | -0.785327 | 2.255079  |
| C  | -3.101191 | -3.314653 | 0.789736  |
| H  | -2.781044 | -3.872891 | -1.274516 |
| H  | -3.139518 | -2.495115 | 2.790462  |
| H  | -3.853323 | -4.074087 | 0.980848  |
| N  | -1.097215 | 1.572942  | -0.256606 |
| N  | -1.189068 | -1.391438 | 0.306344  |

**Table S12.** The energy E (in a.u.) and theoretical Cartesian coordinates (in Å) for the optimized structure of the complex **11c** computed using the  $\omega$ B97X density functional with CRENBL(Pt)/6-311+G\* basis set.

$E_{GS} = -1052.1558160444$

|    |           |           |           |
|----|-----------|-----------|-----------|
| Pt | 0.210393  | 0.205846  | 0.006584  |
| N  | 1.486819  | 1.731703  | -0.371466 |
| N  | 2.359748  | 1.891294  | 0.462143  |
| N  | 3.199319  | 2.115251  | 1.188720  |
| N  | 1.784242  | -0.987288 | 0.469120  |
| N  | 1.813000  | -2.058573 | -0.098241 |
| N  | 1.898939  | -3.082824 | -0.580933 |
| O  | 0.234569  | -0.310656 | -1.947050 |
| H  | 1.003777  | 0.103865  | -2.347217 |
| O  | -0.006679 | 0.693883  | 1.959862  |
| H  | 0.789460  | 0.426440  | 2.427893  |
| N  | -1.105825 | -1.380213 | 0.257860  |
| C  | -1.780700 | -1.734750 | 1.402181  |
| C  | -1.363109 | -2.277471 | -0.669431 |
| C  | -2.468024 | -2.879373 | 1.148859  |
| H  | -1.686349 | -1.134012 | 2.293938  |
| H  | -0.948201 | -2.250619 | -1.667639 |
| H  | -3.108579 | -3.485510 | 1.769047  |
| H  | -2.522765 | -4.016764 | -0.658410 |
| N  | -2.193851 | -3.204615 | -0.164248 |
| N  | -1.335166 | 1.527613  | -0.355468 |
| C  | -1.788110 | 2.378662  | 0.537053  |
| C  | -1.993398 | 1.748602  | -1.540880 |
| H  | -1.431179 | 2.428003  | 1.556560  |
| C  | -2.877932 | 2.762626  | -1.348797 |
| H  | -1.746699 | 1.165463  | -2.414964 |
| H  | -3.234395 | 3.886959  | 0.431581  |
| H  | -3.576596 | 3.243165  | -2.014593 |
| N  | -2.734503 | 3.146569  | -0.030559 |

**Table S13.** The energy E (in a.u.) and theoretical Cartesian coordinates (in Å) for the optimized structure of the complex **12c** computed using the  $\omega$ B97X density functional with CRENBL(Pt)/6-311+G\* basis set.

$E_{GS} = -1095.0515378293$

|    |           |           |           |
|----|-----------|-----------|-----------|
| Pt | 0.535202  | 0.053088  | 0.003412  |
| N  | 1.907443  | 1.520860  | -0.176297 |
| N  | 2.746534  | 1.568576  | 0.710665  |
| N  | 3.559886  | 1.687946  | 1.485948  |
| N  | 1.945479  | -1.377318 | 0.186823  |
| N  | 2.789719  | -1.400720 | -0.696216 |
| N  | 3.609723  | -1.496502 | -1.467753 |
| N  | -1.081746 | 1.352804  | -0.068919 |
| C  | -0.966951 | 2.676133  | -0.136069 |
| H  | 0.051940  | 3.050405  | -0.163165 |
| C  | -2.086375 | 3.493484  | -0.170939 |
| H  | -1.965723 | 4.569021  | -0.224533 |
| C  | -3.340223 | 2.904451  | -0.133712 |
| H  | -4.237109 | 3.515072  | -0.157018 |
| C  | -3.445156 | 1.520910  | -0.065741 |
| H  | -4.420002 | 1.049379  | -0.035876 |
| C  | -2.287624 | 0.758453  | -0.035299 |
| N  | -1.046848 | -1.288878 | 0.072103  |
| C  | -0.897401 | -2.608753 | 0.139274  |
| H  | 0.130919  | -2.956188 | 0.166911  |
| C  | -1.995012 | -3.455221 | 0.173733  |
| H  | -1.846087 | -4.527208 | 0.227527  |
| C  | -3.263868 | -2.899343 | 0.135930  |
| H  | -4.144410 | -3.533307 | 0.159006  |
| C  | -3.405048 | -1.519034 | 0.067601  |
| H  | -4.392053 | -1.073649 | 0.037135  |
| C  | -2.267993 | -0.726396 | 0.037764  |
| O  | 0.471848  | -0.136535 | -2.004177 |
| H  | 1.162728  | 0.419870  | -2.376351 |
| O  | 0.460936  | 0.241115  | 2.010785  |
| H  | 1.165492  | -0.296262 | 2.385258  |

**Figure S1.** Structure of complex **2c** optimized using the  $\omega$ B97X density functional with CRENBL(Pt)/6-311+G\* basis set.

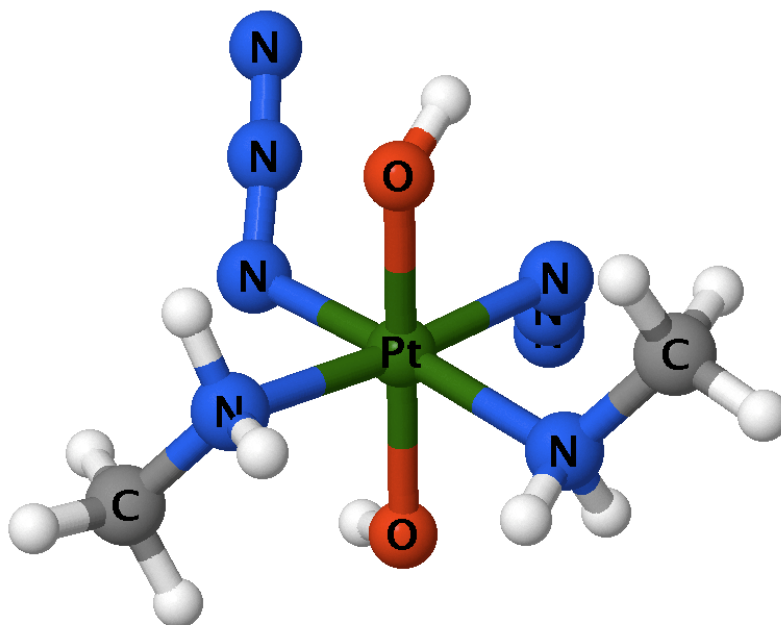

**Figure S2.** Structure of complex **3c** optimized using the  $\omega$ B97X density functional with CRENBL(Pt)/6-311+G\* basis set.

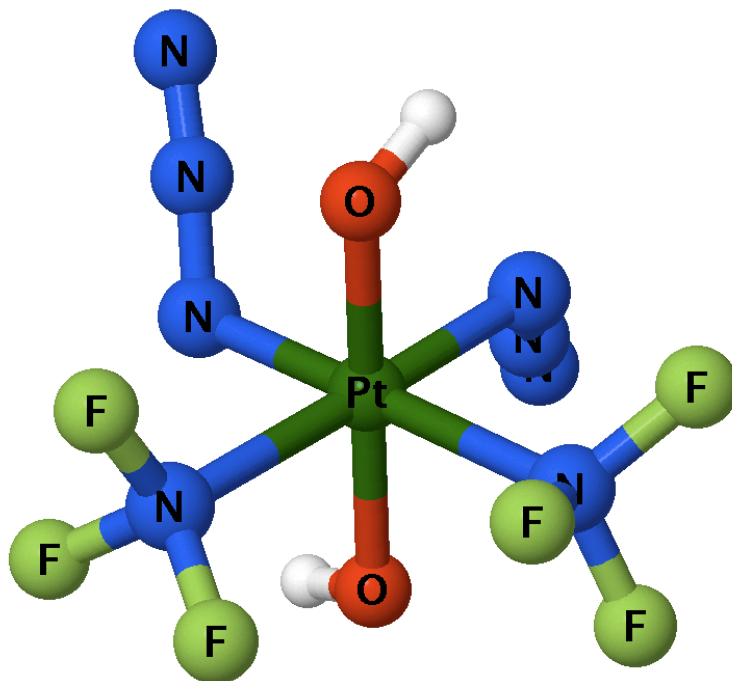



**Figure S3.** Structure of complex **4c** optimized using the  $\omega$ B97X density functional with CRENBL(Pt)/6-311+G\* basis set.

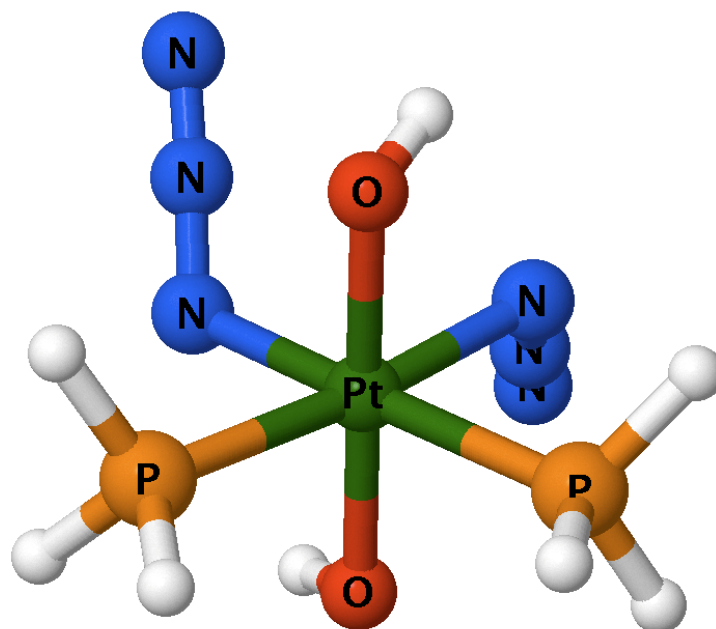

**Figure S4.** Structure of complex **5c** optimized using the  $\omega$ B97X density functional with CRENBL(Pt)/6-311+G\* basis set.

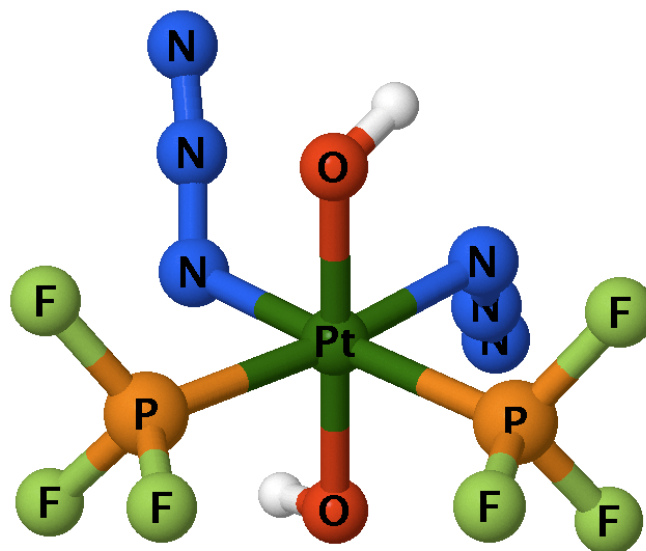

**Figure S5.** Structure of complex **6c** optimized using the  $\omega$ B97X density functional with CRENBL(Pt)/6-311+G\* basis set.

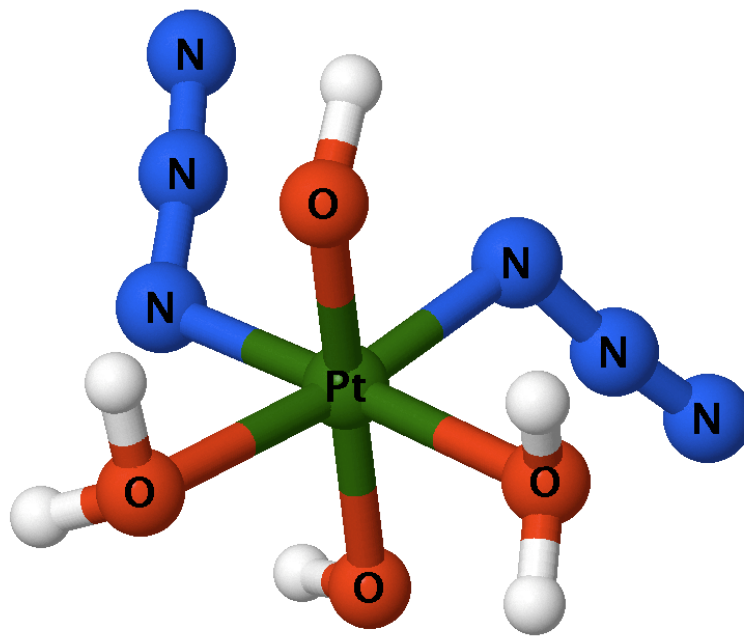

**Figure S6.** Structure of complex **7c** optimized using the  $\omega$ B97X density functional with CRENBL(Pt)/6-311+G\* basis set.

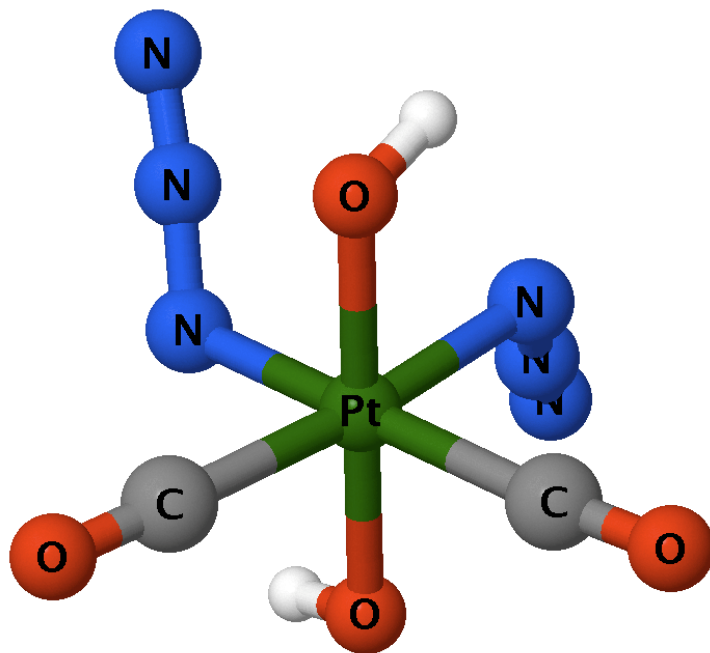

**Figure S7.** Structure of complex **8c** optimized using the  $\omega$ B97X density functional with CRENBL(Pt)/6-311+G\* basis set.

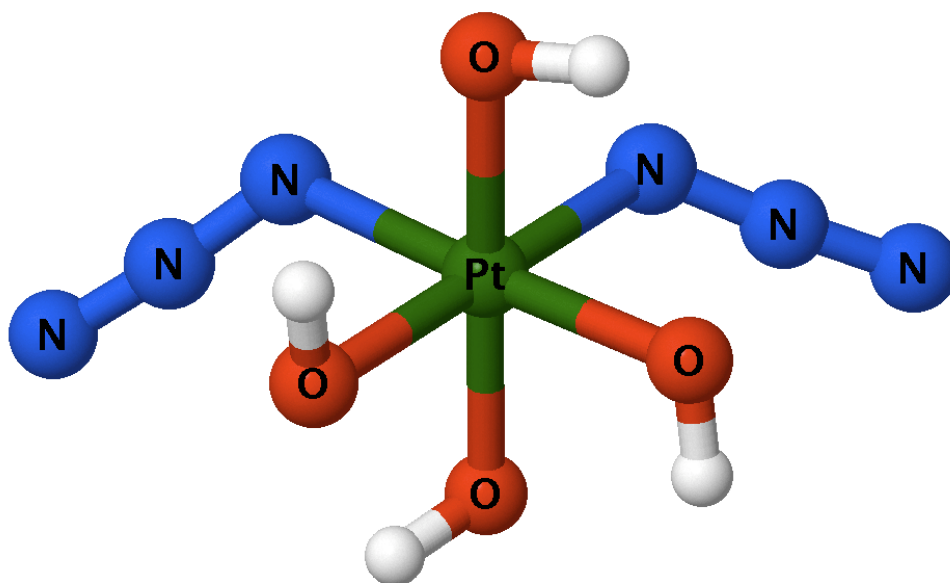

**Figure S8.** Structure of complex **9c** optimized using the  $\omega$ B97X density functional with CRENBL(Pt)/6-311+G\* basis set.

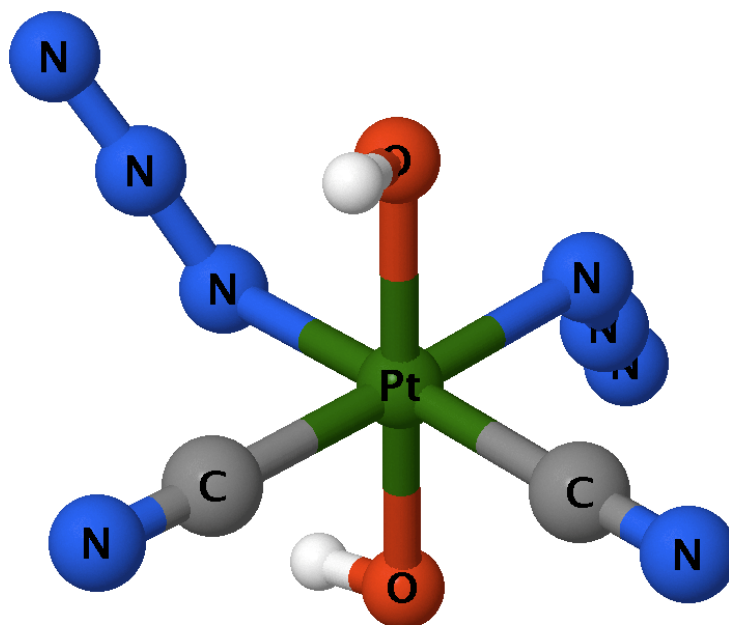

**Figure S9.** Structure of complex **10c** optimized using the  $\omega$ B97X density functional with CRENBL(Pt)/6-311+G\* basis set.

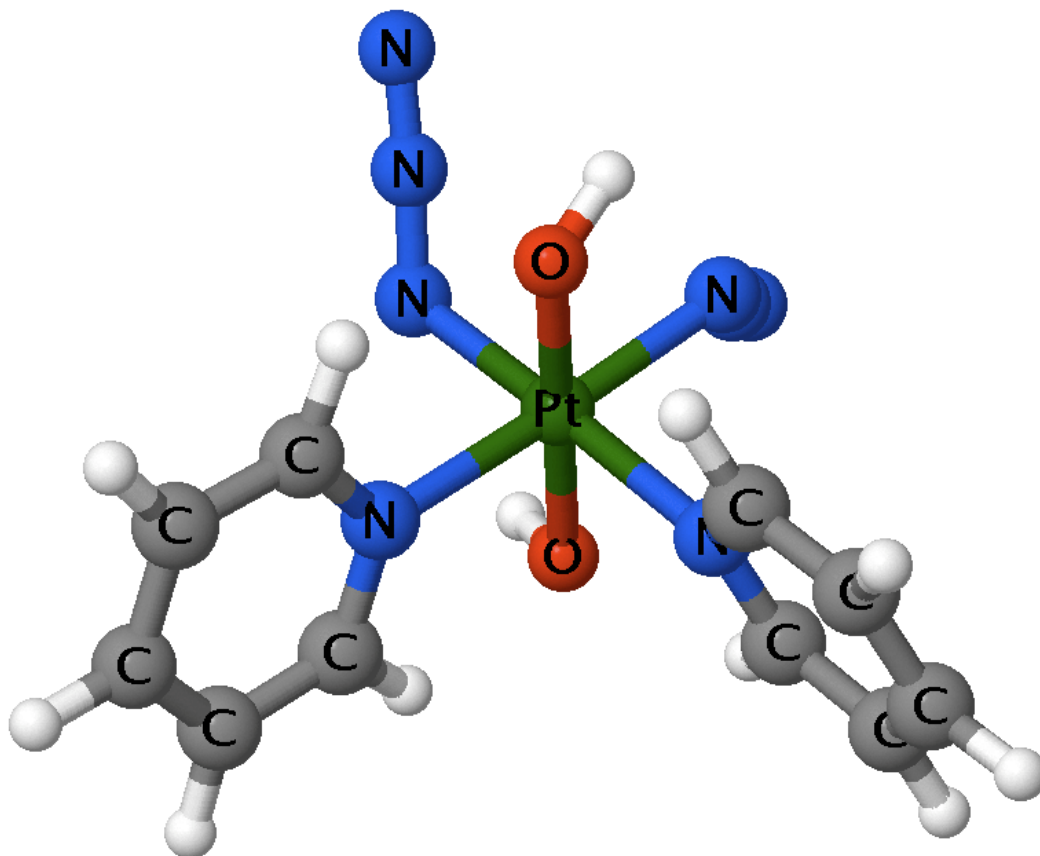





**Figure S11.** Structure of complex **12c** optimized using the  $\omega$ B97X density functional with CRENBL(Pt)/6-311+G\* basis set.

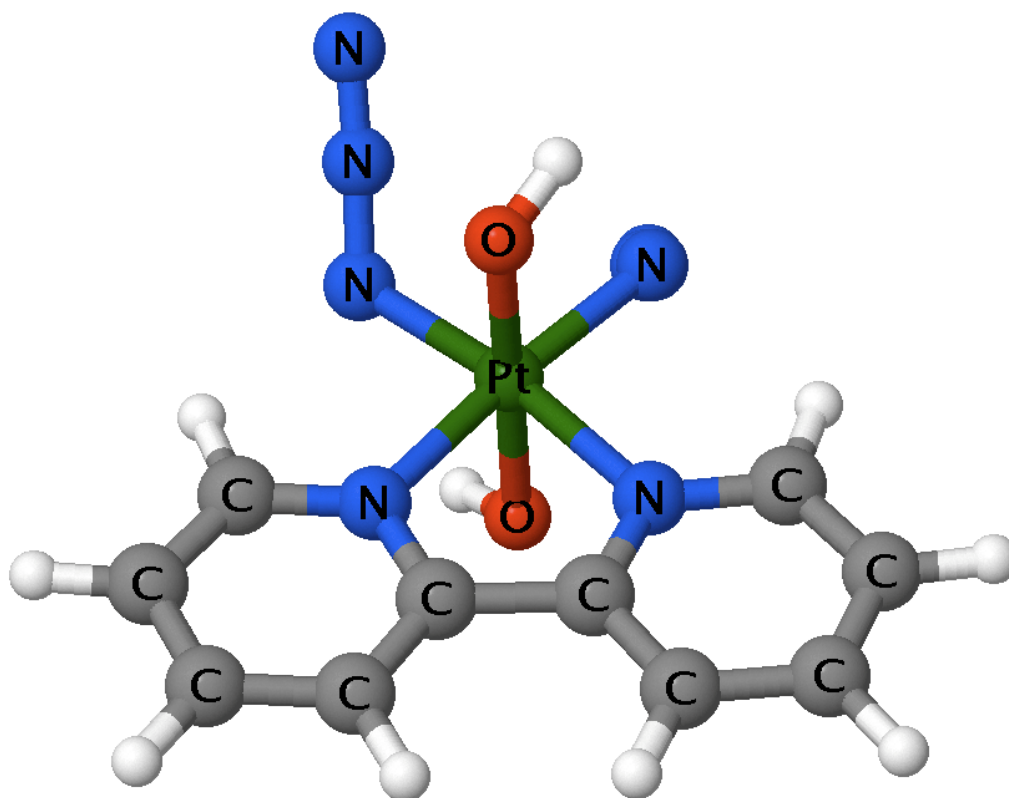

**Figure S12.** Electronic spectrum of complex **2c** computed using the  $\omega$ B97X density functional with CRENL(Pt)/6-311+G\* basis set.

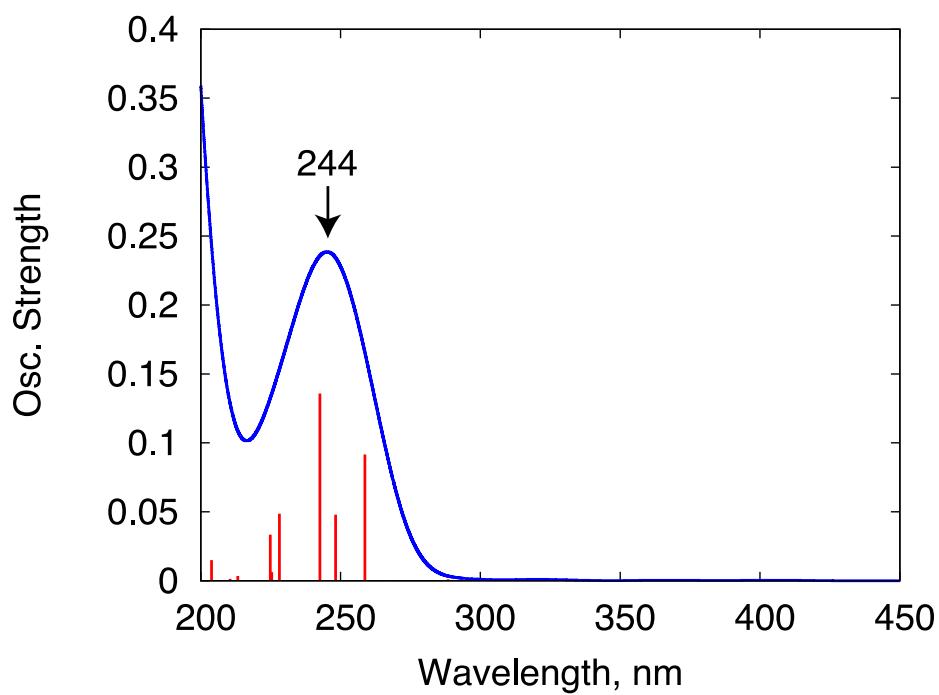

**Figure S13.** Electronic spectrum of complex **3c** computed using the  $\omega$ B97X density functional with CRENL(Pt)/6-311+G\* basis set.

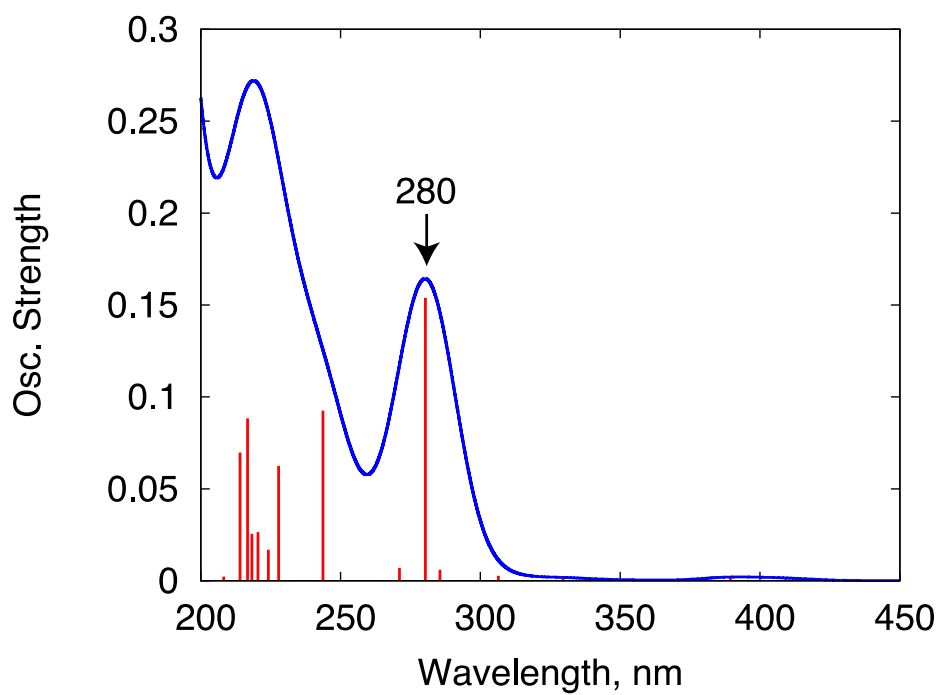

**Figure S14.** Electronic spectrum of complex **4c** computed using the  $\omega$ B97X density functional with CRENL(Pt)/6-311+G\* basis set.

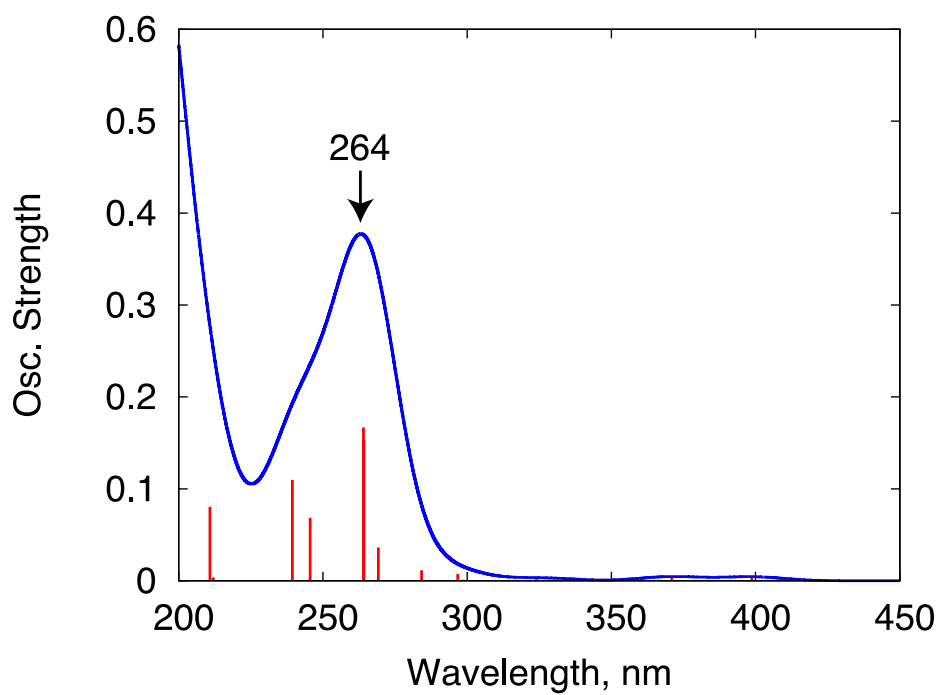

**Figure S15.** Electronic spectrum of complex **5c** computed using the  $\omega$ B97X density functional with CRENL(Pt)/6-311+G\* basis set.

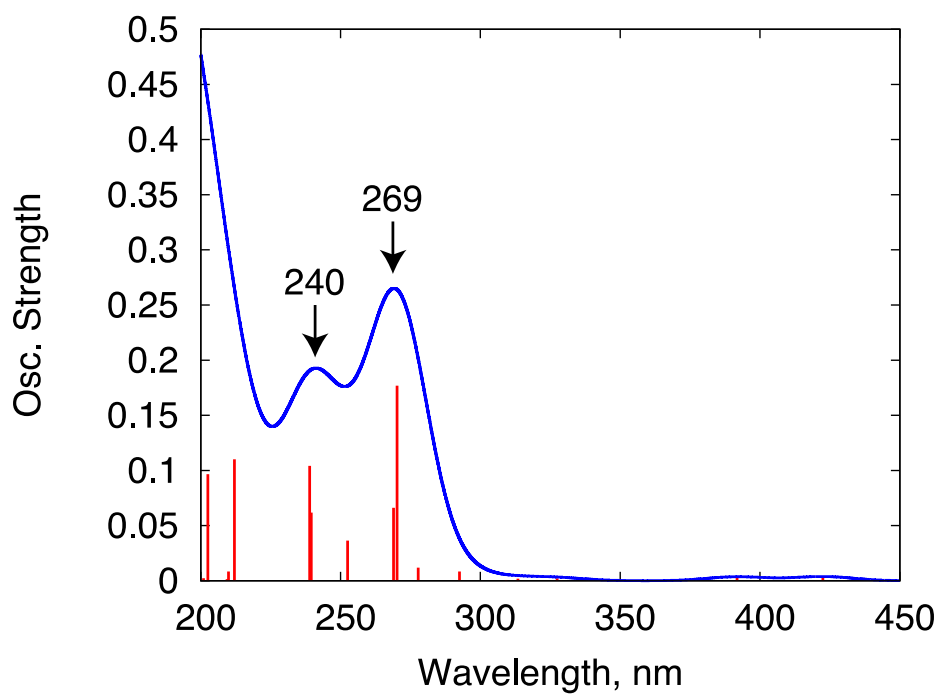

**Figure S16.** Electronic spectrum of complex **6c** computed using the  $\omega$ B97X density functional with CRENL(Pt)/6-311+G\* basis set.

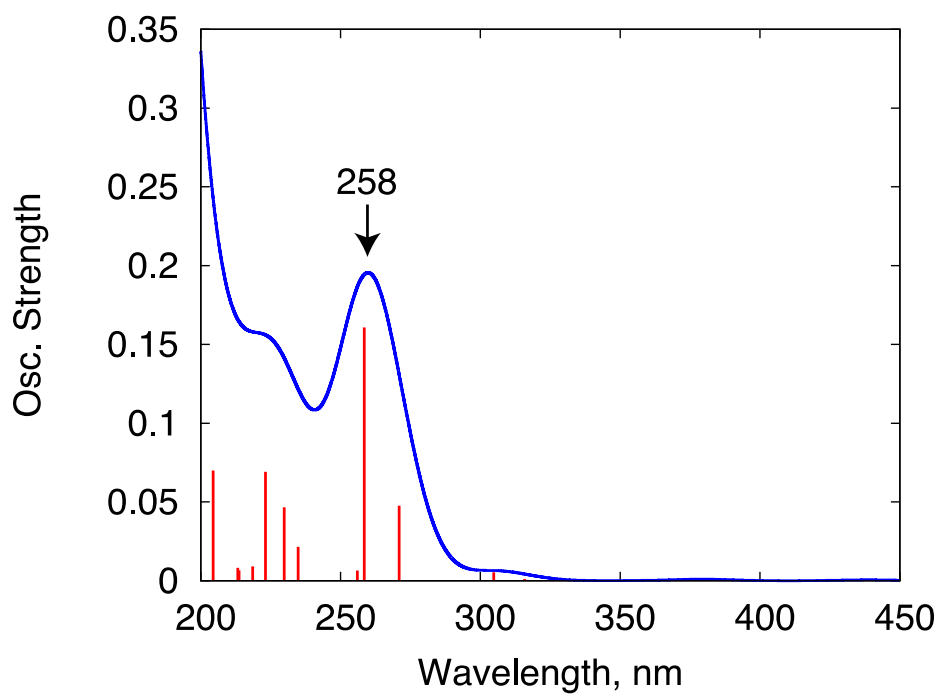

**Figure S17.** Electronic spectrum of complex **7c** computed using the  $\omega$ B97X density functional with CRENL(Pt)/6-311+G\* basis set.

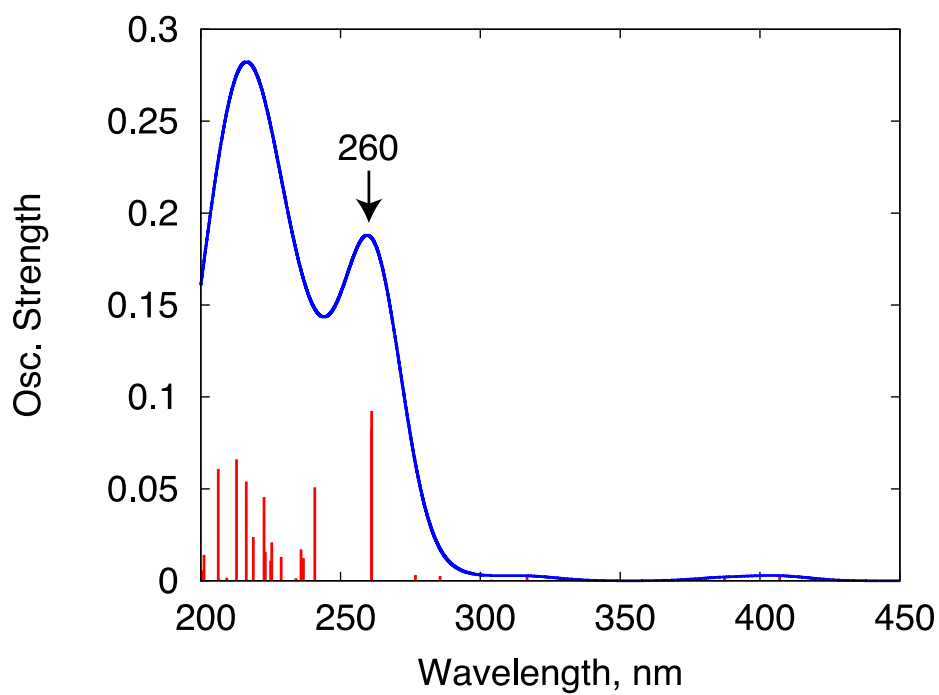

**Figure S18.** Electronic spectrum of complex **8c** computed using the  $\omega$ B97X density functional with CRENL(Pt)/6-311+G\* basis set.

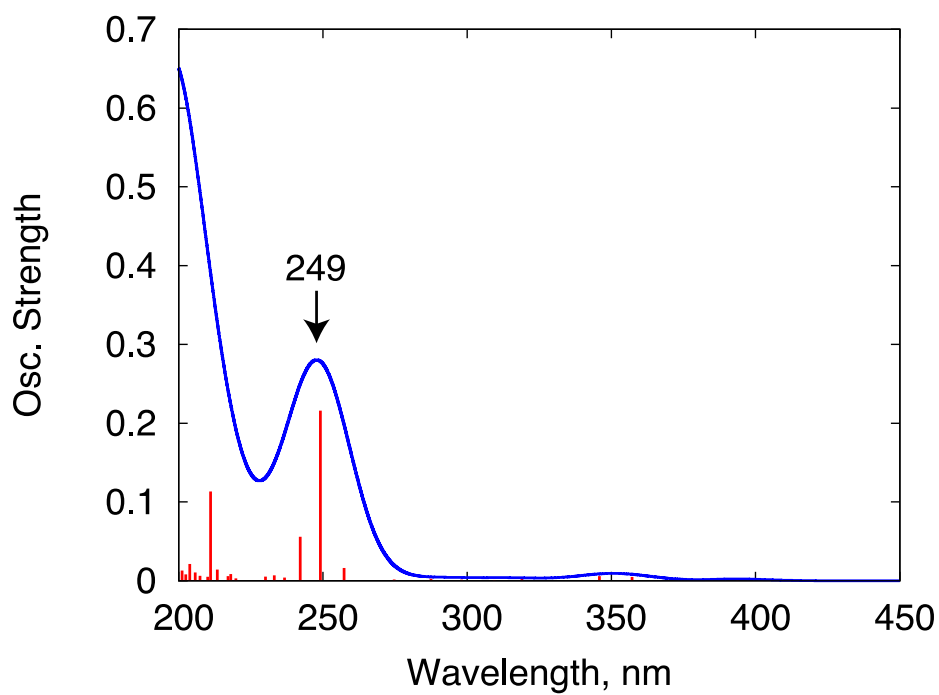



**Figure S19.** Electronic spectrum of complex **9c** computed using the  $\omega$ B97X density functional with CRENL(Pt)/6-311+G\* basis set.

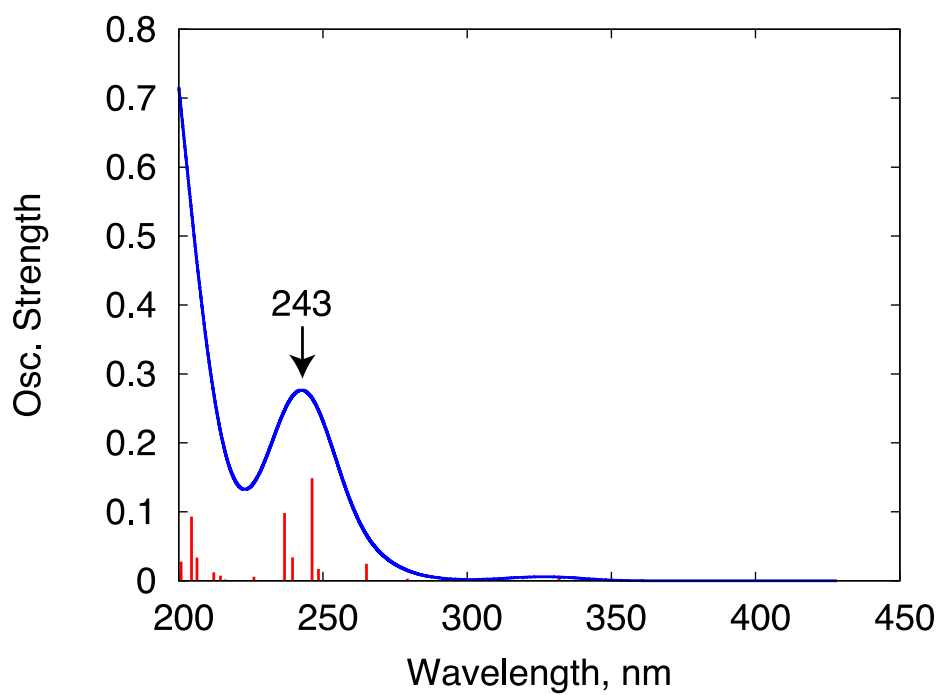

**Figure S20.** Electronic spectrum of complex **10c** computed using the  $\omega$ B97X density functional with CRENL(Pt)/6-311+G\* basis set.

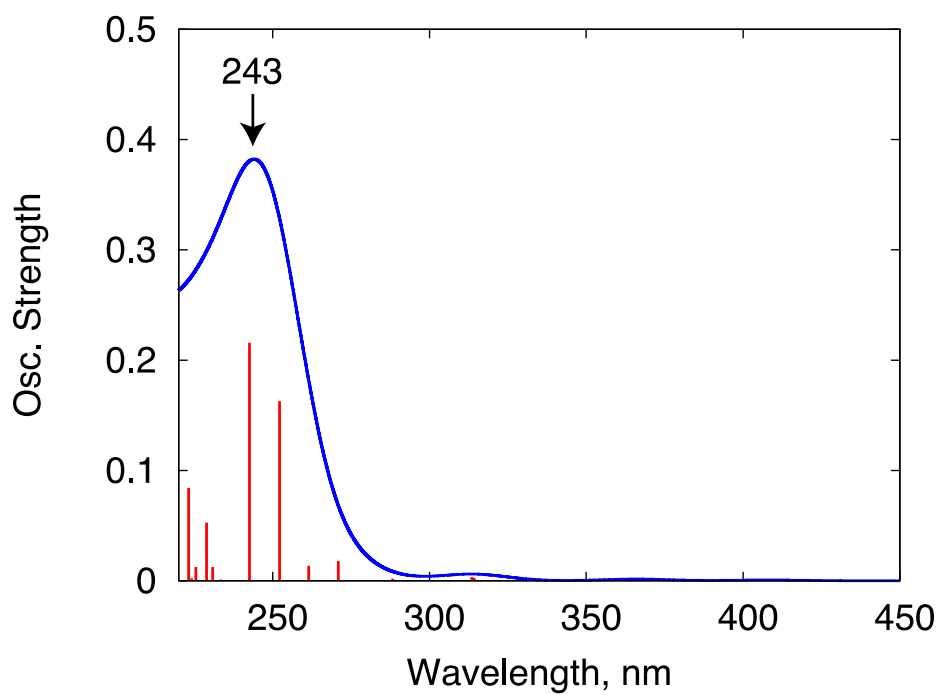

**Figure S21.** Electronic spectrum of complex **11c** computed using the  $\omega$ B97X density functional with CRENL(Pt)/6-311+G\* basis set.

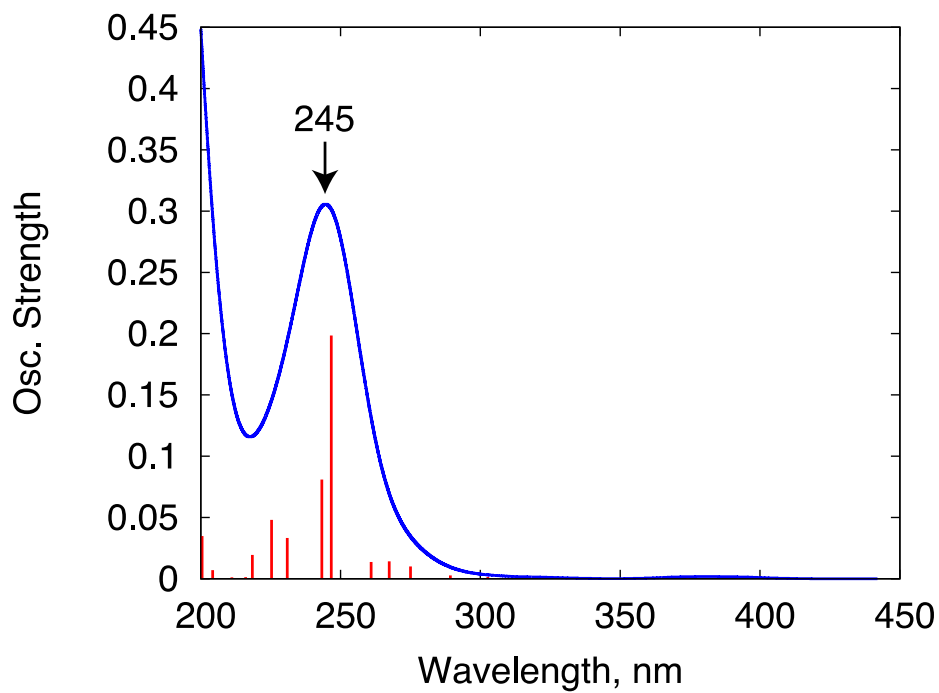

**Figure S22.** Electronic spectrum of complex **12c** computed using the  $\omega$ B97X density functional with CRENL(Pt)/6-311+G\* basis set.

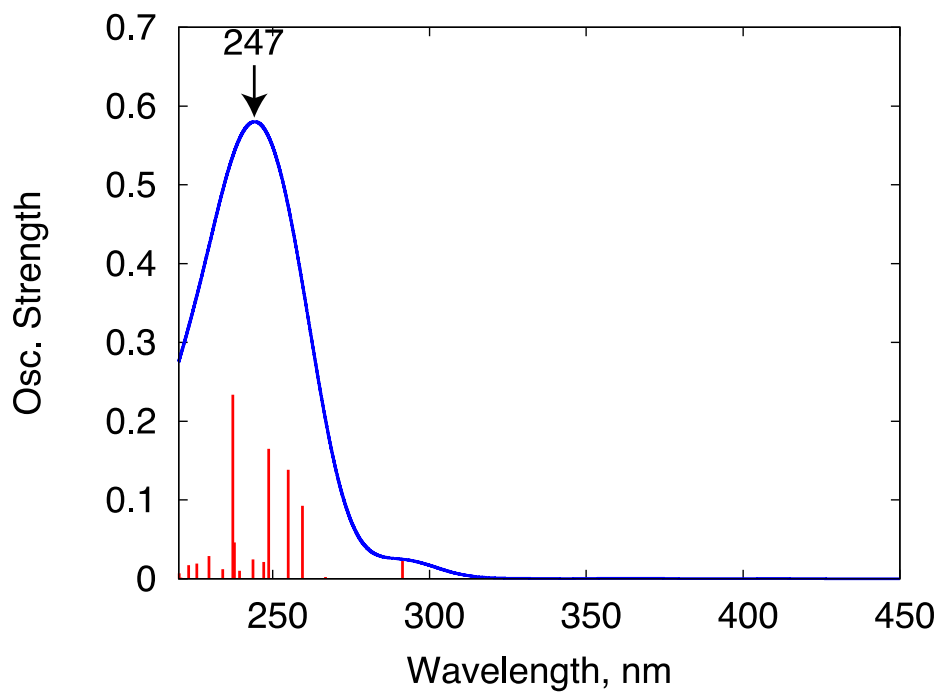

Supplement: supportinginformation.pdf [file supportinginformation.pdf]
